# Supplementary material for: An Exploratory Study of the Metabolite Profiling from Pesticides Exposed Workers
Source: MDPI journal article supplement (doi:10.3390/metabo13050596), 2023-04-27
Supplement: s1 [file s1]

## Supplementary Materials:

**Table S1** - Gradient elution and flow rate used in chromatographic separation.

| Time (min) | Rate (mL/min) | % A  | % B  |
|------------|---------------|------|------|
| 0          | 0.400         | 98.0 | 2.0  |
| 3          | 0.400         | 98.0 | 2.0  |
| 8          | 0.400         | 90.0 | 10.0 |
| 14         | 0.400         | 50.0 | 50.0 |
| 14.50      | 0.400         | 0.0  | 100  |
| 16         | 0.400         | 0.0  | 100  |
| 16.50      | 0.400         | 98.0 | 2.0  |
| 20         | 0.400         | 98.0 | 2.0  |

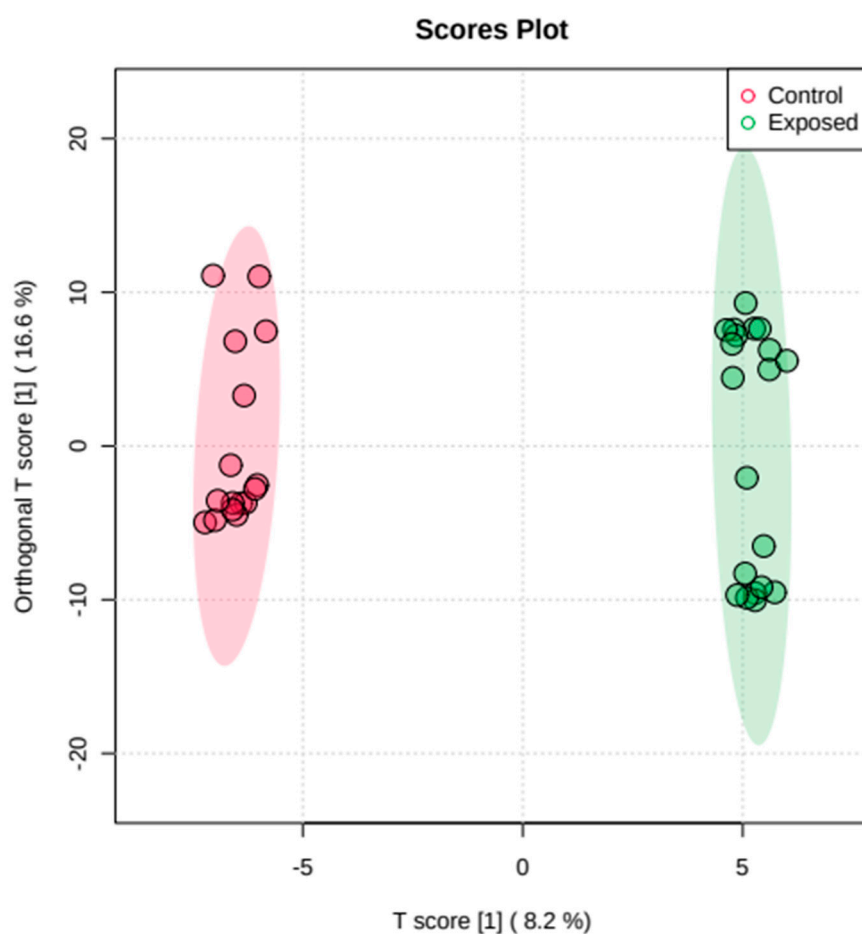

**Figure S1** - OPLS-DA score graph for plasma samples from individuals exposed and non-exposed occupationally to pesticides.

**1-[2-chloro-4-(4-chlorophenoxy)phenyl]-2-(1,2,4-triazol-1-yl)eth**

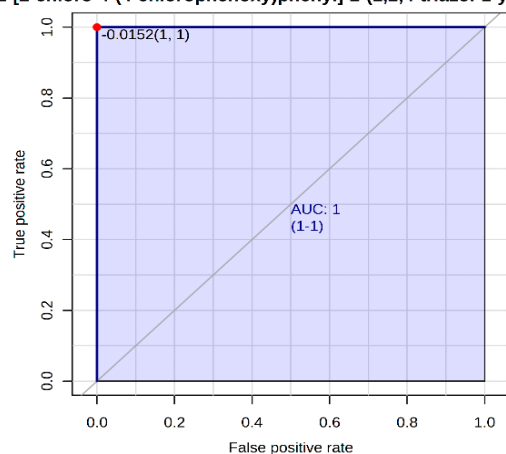

**PG(18:3(9Z,12Z,15Z)/22:4(7Z,10Z,13Z,16Z))**

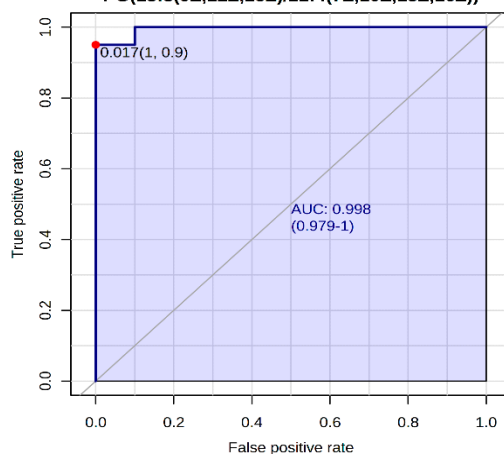

**Cer(d16:1/LTE4)**

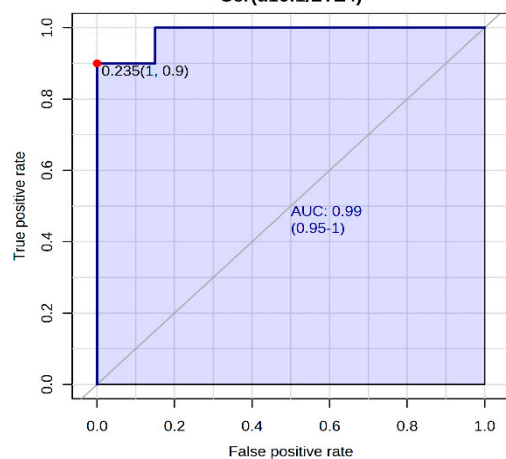

**PI(20:5(5Z,8Z,11Z,14Z,17Z)/0:0)**

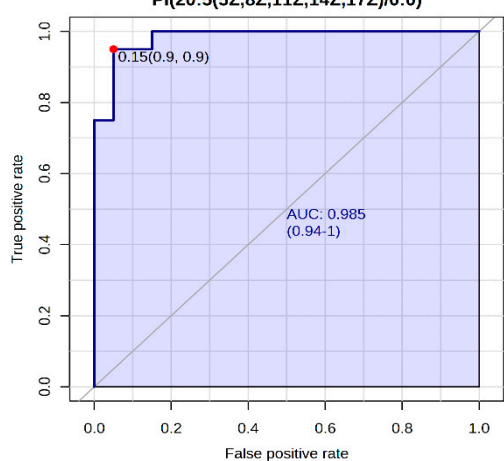

**LysoPA(0:0/18:1(9Z))**

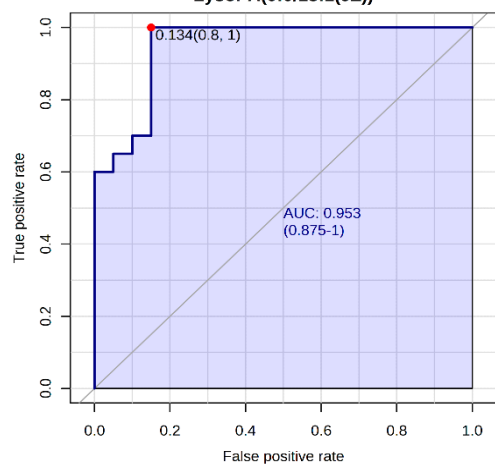

**Sphingomyelin**

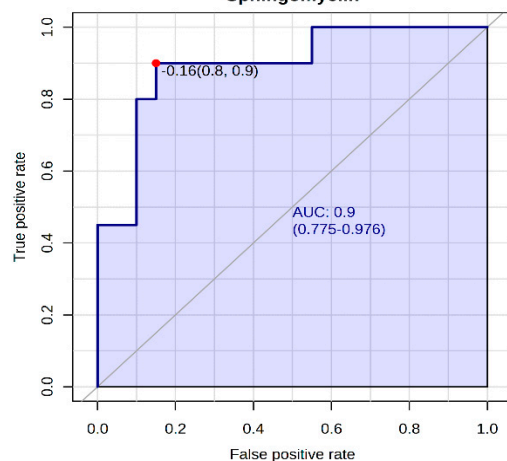

**Figure S2** - ROC curves of some of the discriminating plasma compounds identified by liquid chromatography coupled to mass spectrometry, where AUC = area under the curve, with a 95% confidence interval.

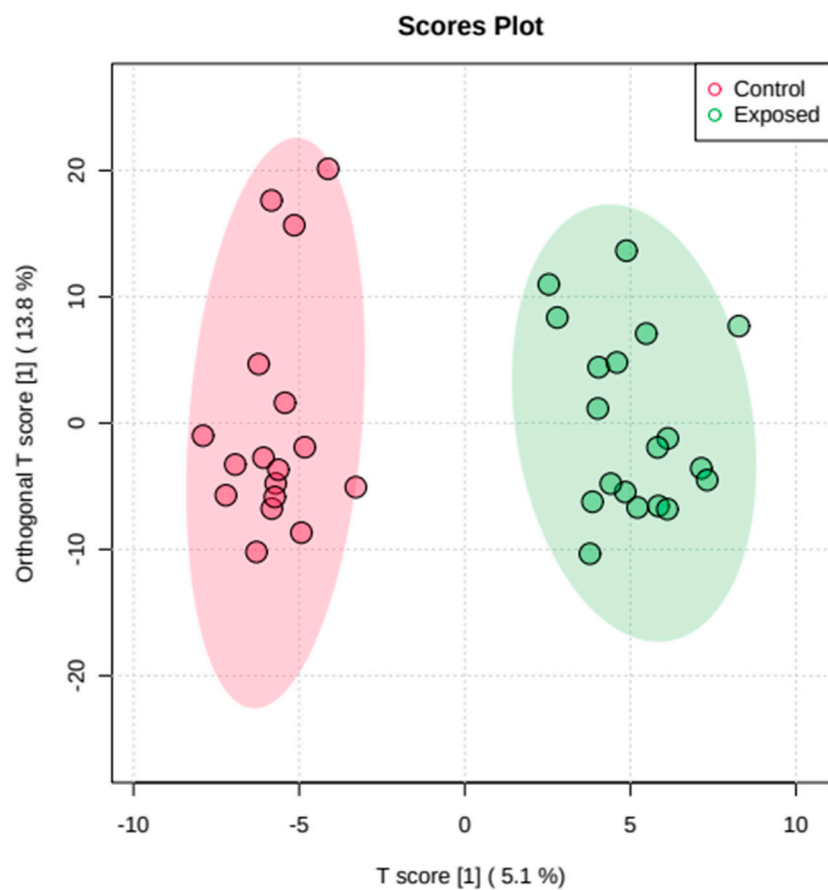

**Figure S3** - Orthogonal Partial Least Squares Discriminant Analysis (OPLS-DA) for urine samples from individuals participating in the study.

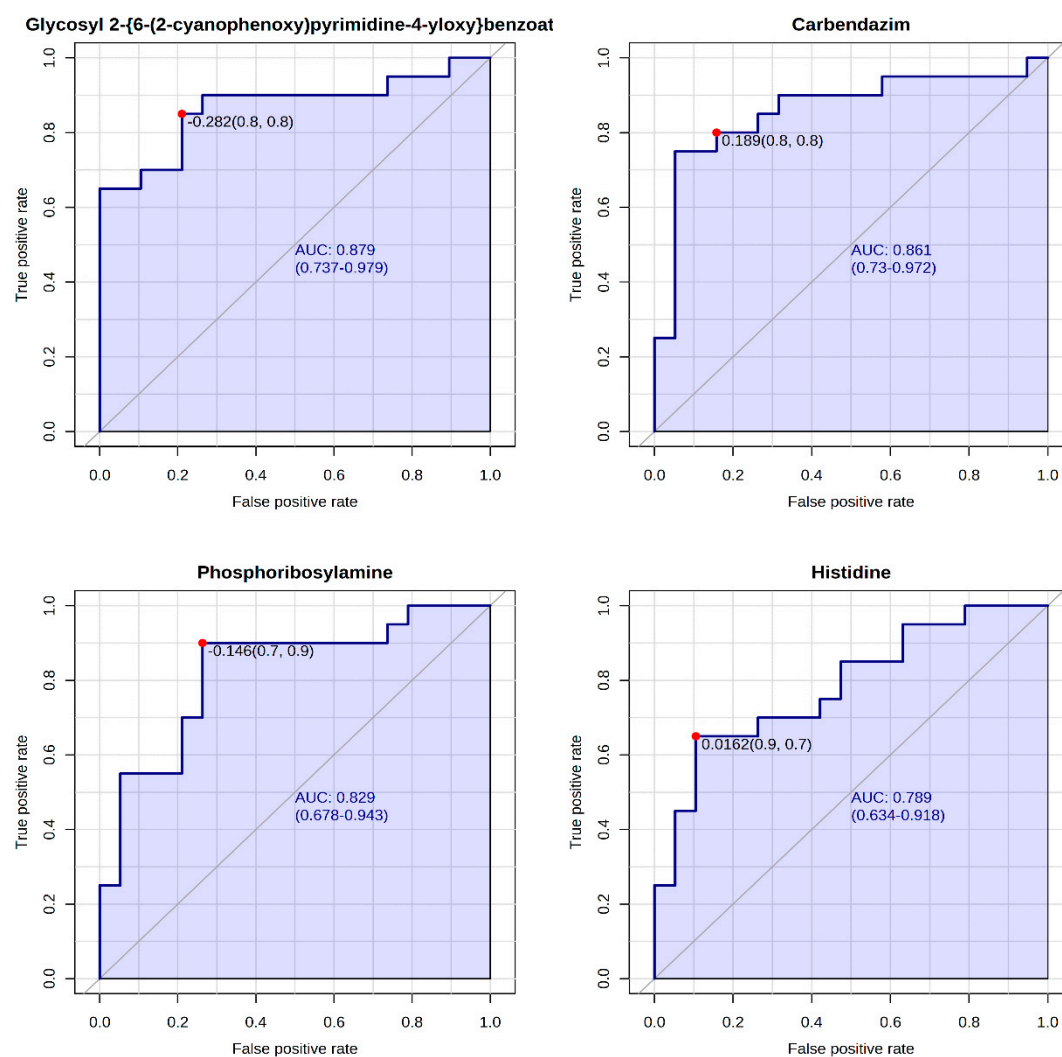

**Figure S4** - ROC curves of some discriminating urinary analytes identified by liquid chromatography coupled to mass spectrometry. Note: AUC: area under the ROC curve, with a 95% confidence interval.
